# Supplementary material for: Australian vegetated coastal ecosystems as global hotspots for climate change mitigation
Source: PubMed Central journal article supplement (PMC6773740; doi:10.1038/s41467-019-12176-8), 2019-10-02
Supplement: 41467_2019_12176_MOESM2_ESM.pdf [file 41467_2019_12176_MOESM2_ESM.pdf]

- 1 **Australian vegetated coastal ecosystems as global hotspots for climate change**
- 2 **mitigation**
- 3 Serrano et al.

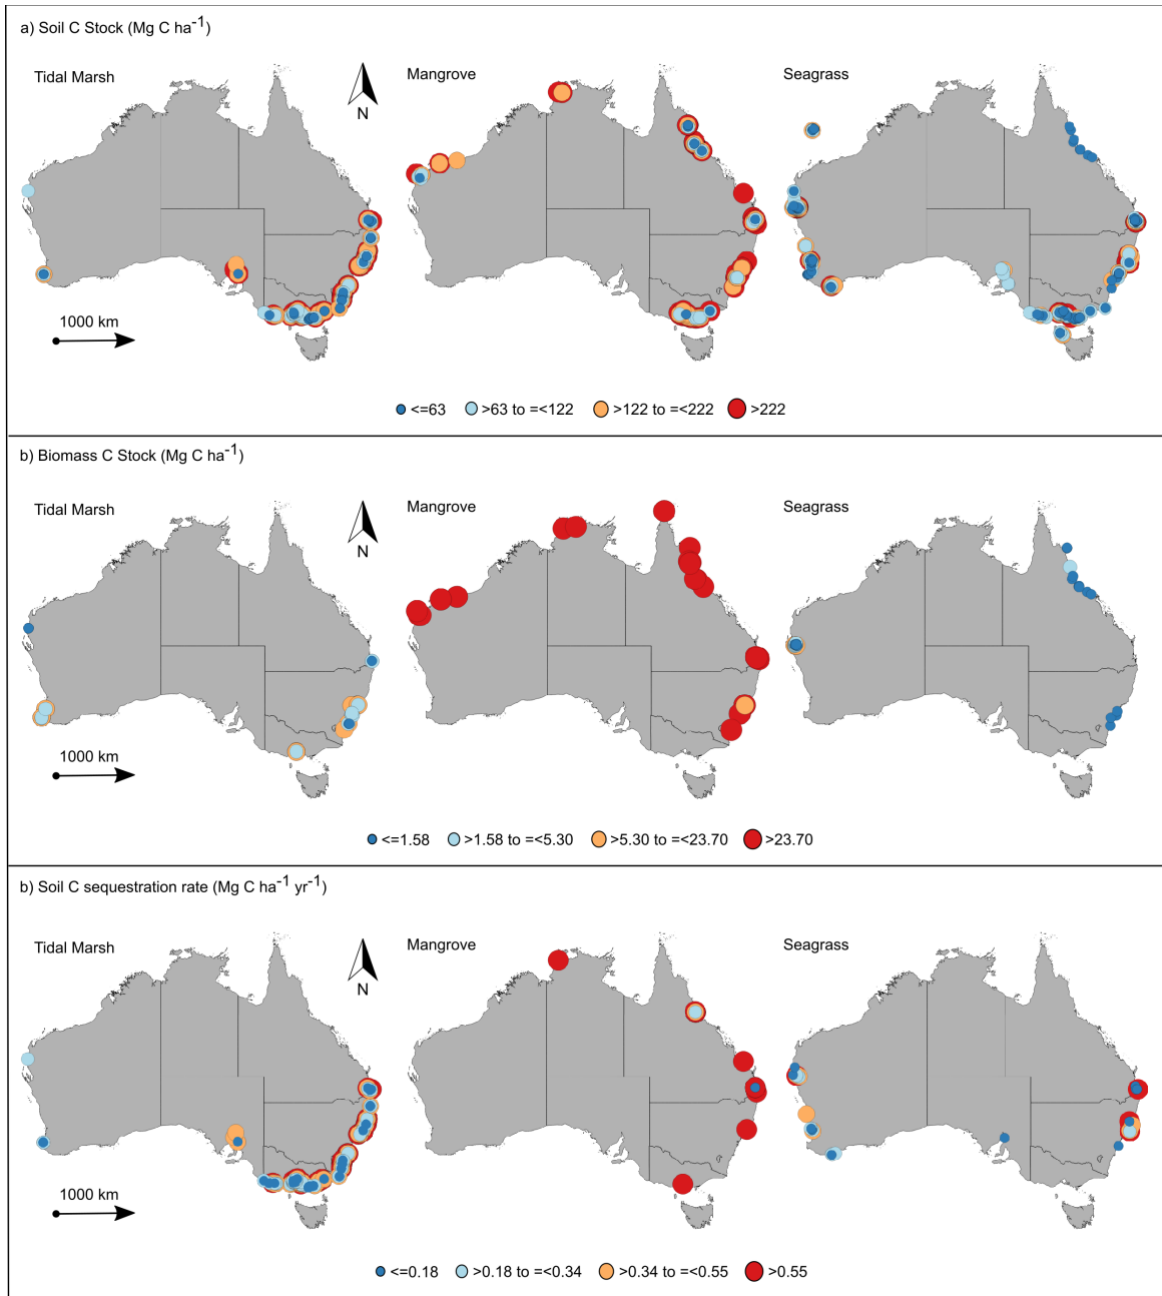

6 **Supplementary Figure 1.** Direct measurements of organic carbon (C) storage in  
 7 vegetated coastal ecosystems (i.e. tidal marshes, mangroves and seagrasses) across  
 8 Australia. **a)** Soil C storage ( $\text{Mg C ha}^{-1}$ ) in the top meter. **b)** Living aboveground biomass  
 9 C stock ( $\text{Mg C ha}^{-1}$ ). **c)** Soil C sequestration rates ( $\text{Mg C ha}^{-1} \text{ yr}^{-1}$ ). The size and colour of  
 10 dots show the magnitude of C storage: C stocks in living aboveground biomass and the  
 11 top meter of soil ranging from  $<1.58$  to  $>222$   $\text{Mg C ha}^{-1}$ , and soil C sequestration rates  
 12 ranging from  $<0.18$  to  $>0.55$   $\text{Mg C ha}^{-1} \text{ yr}^{-1}$ . The four ranges of data (indicated by different

13 colours) are based on the lower quartile, median quartile, and upper quartile. Source data

14 are provided as a Source Data file.

15

16 **Supplementary Table 1. General Linear Models.** Living aboveground biomass organic  
 17 carbon (C) stock, soil C stock (in the top meter) and soil C sequestration rates in response  
 18 to climate region and ecosystem type (fixed effects), and interaction between climate  
 19 region and ecosystem type. Climate region: arid, semi-arid, temperate, subtropical and  
 20 tropical. Ecosystem: tidal marsh, mangrove, seagrass. Significant interactions from post-  
 21 hoc HSD tests are indicated with numbers in superscript ( $P < 0.05$ ).

| Variable                                                | Factor                                     | df | Mean Square   | F     | P                |
|---------------------------------------------------------|--------------------------------------------|----|---------------|-------|------------------|
| Aboveground biomass C stock<br>(Mg C ha <sup>-1</sup> ) | <sup>1</sup> Climate region                | 4  | 53,417,196    | 2.94  | <b>0.023</b>     |
|                                                         | <sup>2</sup> Ecosystem                     | 2  | 1,047,413,681 | 57.65 | <b>&lt;0.001</b> |
|                                                         | <sup>3</sup> Climate region *<br>Ecosystem | 3  | 68,069,883    | 3.75  | <b>0.013</b>     |
| Soil C stock<br>(Mg C ha <sup>-1</sup> )                | <sup>4</sup> Climate region                | 4  | 40,784        | 3.08  | <b>0.016</b>     |
|                                                         | <sup>5</sup> Ecosystem                     | 2  | 532,031       | 40.17 | <b>&lt;0.001</b> |
|                                                         | <sup>6</sup> Climate region *<br>Ecosystem | 7  | 93,491        | 7.06  | <b>&lt;0.001</b> |
| Soil C sequestration rates<br>(Mg C ha <sup>-1</sup> )  | <sup>4</sup> Climate region                | 4  | 4,395         | 3.45  | <b>&lt;0.01</b>  |
|                                                         | <sup>2</sup> Ecosystem                     | 2  | 26,156        | 20.55 | <b>&lt;0.001</b> |
|                                                         | <sup>7</sup> Climate region *<br>Ecosystem | 5  | 3,012         | 2.37  | <b>0.039</b>     |

<sup>1</sup>Subtropical = Tropical > Temperate = Arid

<sup>2</sup>Mangrove > Tidal marsh = Seagrass

<sup>3</sup>Tidal marsh: Temperate > Semi-arid = Subtropical

<sup>3</sup>Mangrove: Tropical > Temperate

<sup>3</sup>Seagrass: Arid > Temperate = Tropical

<sup>4</sup>Tropical > Arid = Semi-arid = Temperate =  
Subtropical

<sup>5</sup>Mangrove > Tidal marsh > Seagrass

<sup>6</sup>Seagrass: Arid > Subtropical

<sup>6</sup>Mangrove: Subtropical > Temperate = Tropical = Arid = Semi-arid

<sup>7</sup>Mangrove: Tropical > Subtropical

22

23

24 **Supplementary Table 2. Organic carbon (C) storage within Australian climate regions.** Estimates of area (in ha) and C stocks in living  
 25 aboveground biomass and soils (in Mg C ha<sup>-1</sup>), and C sequestration rates (Mg C ha<sup>-1</sup> yr<sup>-1</sup>) in vegetated coastal ecosystems (i.e. tidal marshes,  
 26 mangrove forests and seagrass meadows) within Australian climate regions. \* Estimates based on the nearest climate region when data was not  
 27 available. Mean and median ± SD.

28

| Region    | Ecosystem   | Variable                                     | Climate region |           |           |             |           |
|-----------|-------------|----------------------------------------------|----------------|-----------|-----------|-------------|-----------|
|           |             |                                              | Arid           | Semi-arid | Temperate | Subtropical | Tropical  |
| AUSTRALIA | Tidal marsh | Area (ha)                                    | 51,392         | 327,609   | 90,087    | 118,475     | 945,360   |
|           |             | Stock - Aboveground biomass (Tg C)           | 0.05*          | 0.33      | 0.75      | 0.16        | 1.3*      |
|           |             | Stock - Soil (Tg C)                          | 11.3           | 44.4      | 15.5      | 18.1        | 145*      |
|           |             | Sequestration rates (Tg C yr <sup>-1</sup> ) | 0.03           | 0.10      | 0.04      | 0.04        | 0.33*     |
|           | Mangrove    | Area (ha)                                    | 23,412         | 100,180   | 13,706    | 151,002     | 762,577   |
|           |             | Stock - Aboveground biomass (Tg C)           | 2.8            | 11.1*     | 0.97      | 15.3        | 128       |
|           |             | Stock - Soil (Tg C)                          | 3.3            | 15.1      | 3.4       | 55.3        | 180       |
|           |             | Sequestration rates (Tg C yr <sup>-1</sup> ) | 0.02*          | 0.08*     | 0.02      | 0.13        | 1.2       |
|           | Seagrass    | Area (ha)                                    | 2,105,141      | 888,069   | 774,155   | 4,866,351   | 4,138,299 |
|           |             | Stock - Aboveground biomass (Tg C)           | 5.4            | 2.3       | 0.21      | 12.4        | 1.9       |
|           |             | Stock - Soil (Tg C)                          | 273            | 108*      | 78.2      | 439*        | 153       |
|           |             | Sequestration rates (Tg C yr <sup>-1</sup> ) | 0.80           | 0.10      | 0.33      | 1.3         | 1.1*      |

29

30

31

32 **Supplementary Table 3. Organic carbon (C) storage per unit area within climate regions.** C stocks in living aboveground biomass and soils  
33 (in Mg C ha<sup>-1</sup>), and sequestration rates (Mg C ha<sup>-1</sup> yr<sup>-1</sup>) in vegetated coastal ecosystems (i.e. tidal marshes, mangrove forests and seagrass  
34 meadows) within Australian climate regions. Mean and median ± SD.

| Region    | Ecosystem   | Variable                                                      | Climate region |      |        |      |           |      |        |      |           |      |        |      |             |      |        |      |          |      |        |      |
|-----------|-------------|---------------------------------------------------------------|----------------|------|--------|------|-----------|------|--------|------|-----------|------|--------|------|-------------|------|--------|------|----------|------|--------|------|
|           |             |                                                               | Arid           |      |        |      | Semi-arid |      |        |      | Temperate |      |        |      | Subtropical |      |        |      | Tropical |      |        |      |
|           |             |                                                               | N              | Mean | Median | SD   | N         | Mean | Median | SD   | N         | Mean | Median | SD   | N           | Mean | Median | SD   | N        | Mean | Median | SD   |
| AUSTRALIA | Tidal marsh | Stock - Aboveground biomass (Mg C ha <sup>-1</sup> )          | n/a            | n/a  | n/a    | n/a  | 3         | 1.0  | 1.0    | 0.09 | 46        | 8.3  | 7.2    | 6.0  | 3           | 1.4  | 1.5    | 0.4  | n/a      | n/a  | n/a    | n/a  |
|           |             | Stock - Soil (Mg C ha <sup>-1</sup> in 1 m-thick)             | 2              | 221  | 221    | 25   | 4         | 136  | 137    | 89   | 220       | 173  | 141    | 121  | 66          | 153  | 135    | 147  | n/a      | n/a  | n/a    | n/a  |
|           |             | Sequestration rates (Mg C ha <sup>-1</sup> yr <sup>-1</sup> ) | 2              | 0.51 | 0.51   | 0.06 | 4         | 0.31 | 0.31   | 0.20 | 220       | 0.40 | 0.32   | 0.28 | 66          | 0.35 | 0.31   | 0.34 | n/a      | n/a  | n/a    | n/a  |
|           | Mangrove    | Stock - Aboveground biomass (Mg C ha <sup>-1</sup> )          | 8              | 121  | 75     | 95   | n/a       | n/a  | n/a    | n/a  | 9         | 70   | 86     | 41   | 5           | 101  | 78     | 64   | 15       | 167  | 159    | 101  |
|           |             | Stock - Soil (Mg C ha <sup>-1</sup> in 1 m-thick)             | 7              | 141  | 124    | 64   | 10        | 151  | 125    | 95   | 106       | 247  | 234    | 116  | 34          | 366  | 311    | 250  | 105      | 236  | 250    | 141  |
|           |             | Sequestration rates (Mg C ha <sup>-1</sup> yr <sup>-1</sup> ) | n/a            | n/a  | n/a    | n/a  | n/a       | n/a  | n/a    | n/a  | 2         | 1.31 | 1.31   | 0.13 | 9           | 0.85 | 0.84   | 0.41 | 13       | 1.5  | 1.00   | 1.09 |
|           | Seagrass    | Stock - Aboveground biomass (Mg C ha <sup>-1</sup> )          | 36             | 2.5  | 2.1    | 2.1  | n/a       | n/a  | n/a    | n/a  | 4         | 0.27 | 0.23   | 0.21 | n/a         | n/a  | n/a    | n/a  | 12       | 0.46 | 0.21   | 0.57 |

|                                                                      |     |      |      |      |    |      |     |     |     |      |      |      |     |      |      |      |     |     |     |     |
|----------------------------------------------------------------------|-----|------|------|------|----|------|-----|-----|-----|------|------|------|-----|------|------|------|-----|-----|-----|-----|
| Stock - Soil<br>(Mg C ha <sup>-1</sup> in<br>1 m-thick)              | 164 | 130  | 125  | 75   | 15 | 121  | 98  | 109 | 241 | 113  | 83   | 95   | 120 | 90   | 65   | 83   | 9   | 37  | 48  | 22  |
| Sequestration<br>rates. (Mg C<br>ha <sup>-1</sup> yr <sup>-1</sup> ) | 8   | 0.38 | 0.27 | 0.31 | 1  | 0.11 | n/a | n/a | 12  | 0.50 | 0.30 | 0.44 | 15  | 0.26 | 0.20 | 0.19 | n/a | n/a | n/a | n/a |

36 **Supplementary Table 4. Organic carbon (C) storage within Australian administrative jurisdictions.** Estimates of area (in ha) and C stocks  
 37 in living aboveground biomass and soils (in Mg C ha<sup>-1</sup>), and C sequestration rates (Mg C ha<sup>-1</sup> yr<sup>-1</sup>) in vegetated coastal ecosystems (i.e. tidal  
 38 marshes, mangrove forests and seagrass meadows) within Australian jurisdictions. Mean and median ± SD.

39

40

| Region    | Ecosystem   | Variable                                     | State   |           |        |         |        |         |           |
|-----------|-------------|----------------------------------------------|---------|-----------|--------|---------|--------|---------|-----------|
|           |             |                                              | NT      | QLD       | NSW    | VIC     | TAS    | SA      | WA        |
| AUSTRALIA | Tidal marsh | Area (ha)                                    | 428,038 | 601,808   | 15,399 | 49,655  | 12,719 | 48,096  | 377,210   |
|           |             | Stock - Aboveground biomass (Tg C)           | 0.57    | 0.78      | 0.09   | 0.41    | 0.11   | 0.16    | 0.45      |
|           |             | Stock - Soil (Tg C)                          | 65.0    | 90.2      | 2.6    | 8.6     | 2.2    | 7.8     | 57.6      |
|           |             | Sequestration rates (Tg C yr <sup>-1</sup> ) | 0.15    | 0.21      | 0.0003 | 0.02    | 0.01   | 0.02    | 0.13      |
|           | Mangrove    | Area (ha)                                    | 384,679 | 406,097   | 12,726 | 5,746   | 0      | 29,297  | 212,333   |
|           |             | Stock - Aboveground biomass (Tg C)           | 63.5    | 57.6      | 1.0    | 0.40    | n/a    | 3.3     | 32.0      |
|           |             | Stock - Soil (Tg C)                          | 89.4    | 114       | 3.7    | 1.4     | n/a    | 4.4     | 44.3      |
|           |             | Sequestration rates (Tg C yr <sup>-1</sup> ) | 0.58    | 0.51      | 0.01   | 0.01    | n/a    | 0.02    | 0.28      |
|           | Seagrass    | Area (ha)                                    | 666,629 | 8,275,771 | 20,881 | 262,234 | 84,500 | 962,000 | 2,500,000 |
|           |             | Stock - Aboveground biomass (Tg C)           | 0.34    | 13.8      | 0.02   | 0.07    | 0.02   | 2.4     | 5.5       |
|           |             | Stock - Soil (Tg C)                          | 26.3    | 562       | 2.2    | 29.7    | 9.6    | 119     | 311       |
|           |             | Sequestration rates (Tg C yr <sup>-1</sup> ) | 0.17    | 2.1       | 0.01   | 0.13    | 0.04   | 0.19    | 0.94      |

41

42
